# Supplementary material for: Jiang Tang Xiao Ke Granule Protects Hepatic Tissue of Diabetic Mice Through Modulation of Insulin and Ras Signaling – A Bioinformatics Analysis of MicroRNAs and mRNAs Network
Source: PubMed Central journal article supplement (PMC7067923; doi:10.3389/fphar.2020.00173), 2020-03-06

# RPM Distribution of all miRNAs

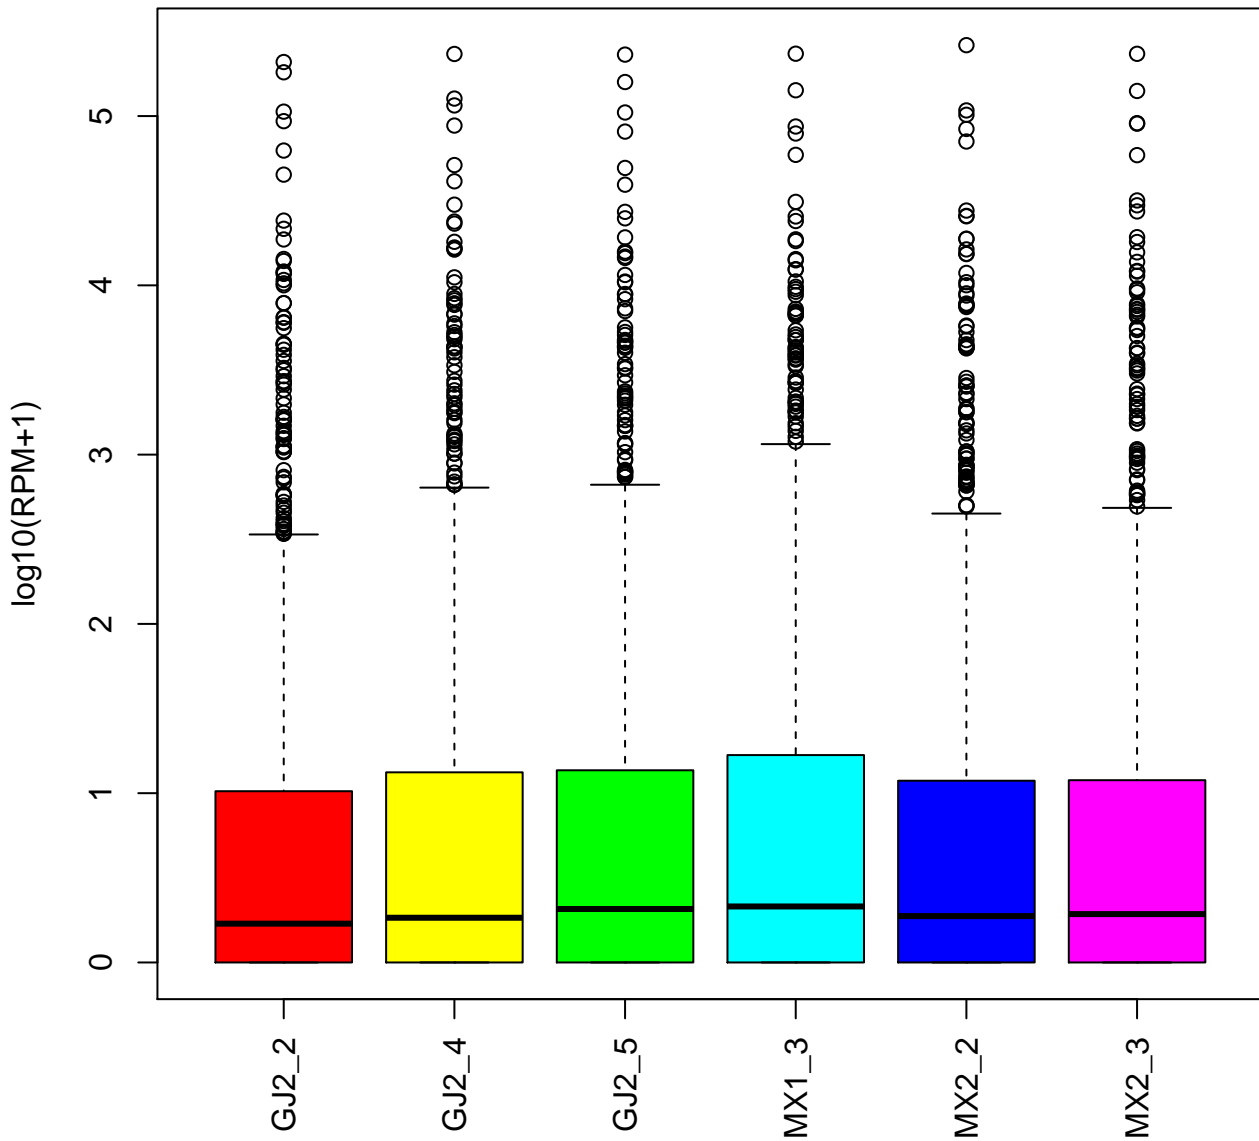

Supplement: Image_1.pdf [file Image_1.pdf]
